# Supplementary material for: GR and LSD1/KDM1A-Targeted Gene Activation Requires Selective H3K4me2 Demethylation at Enhancers
Source: PubMed Central journal article supplement — Cell Rep. Author manuscript; Available in PMC 2020 Aug 18. (PMC7433711; doi:10.1016/j.celrep.2019.05.062), 2019-06-18
Supplement: NIHMS1043941-supplement-GR_and_LSd1_supplemental_information.pdf [file NIHMS1043941-supplement-GR_and_LSd1_supplemental_information.pdf]

Cell Reports, Volume 27

## Supplemental Information

### **GR and LSD1/KDM1A-Targeted Gene Activation Requires Selective H3K4me2 Demethylation at Enhancers**

**Erin A. Clark, Feizhen Wu, Yirui Chen, Paco Kang, Ursula B. Kaiser, Rui Fang, and Yujiang G. Shi**

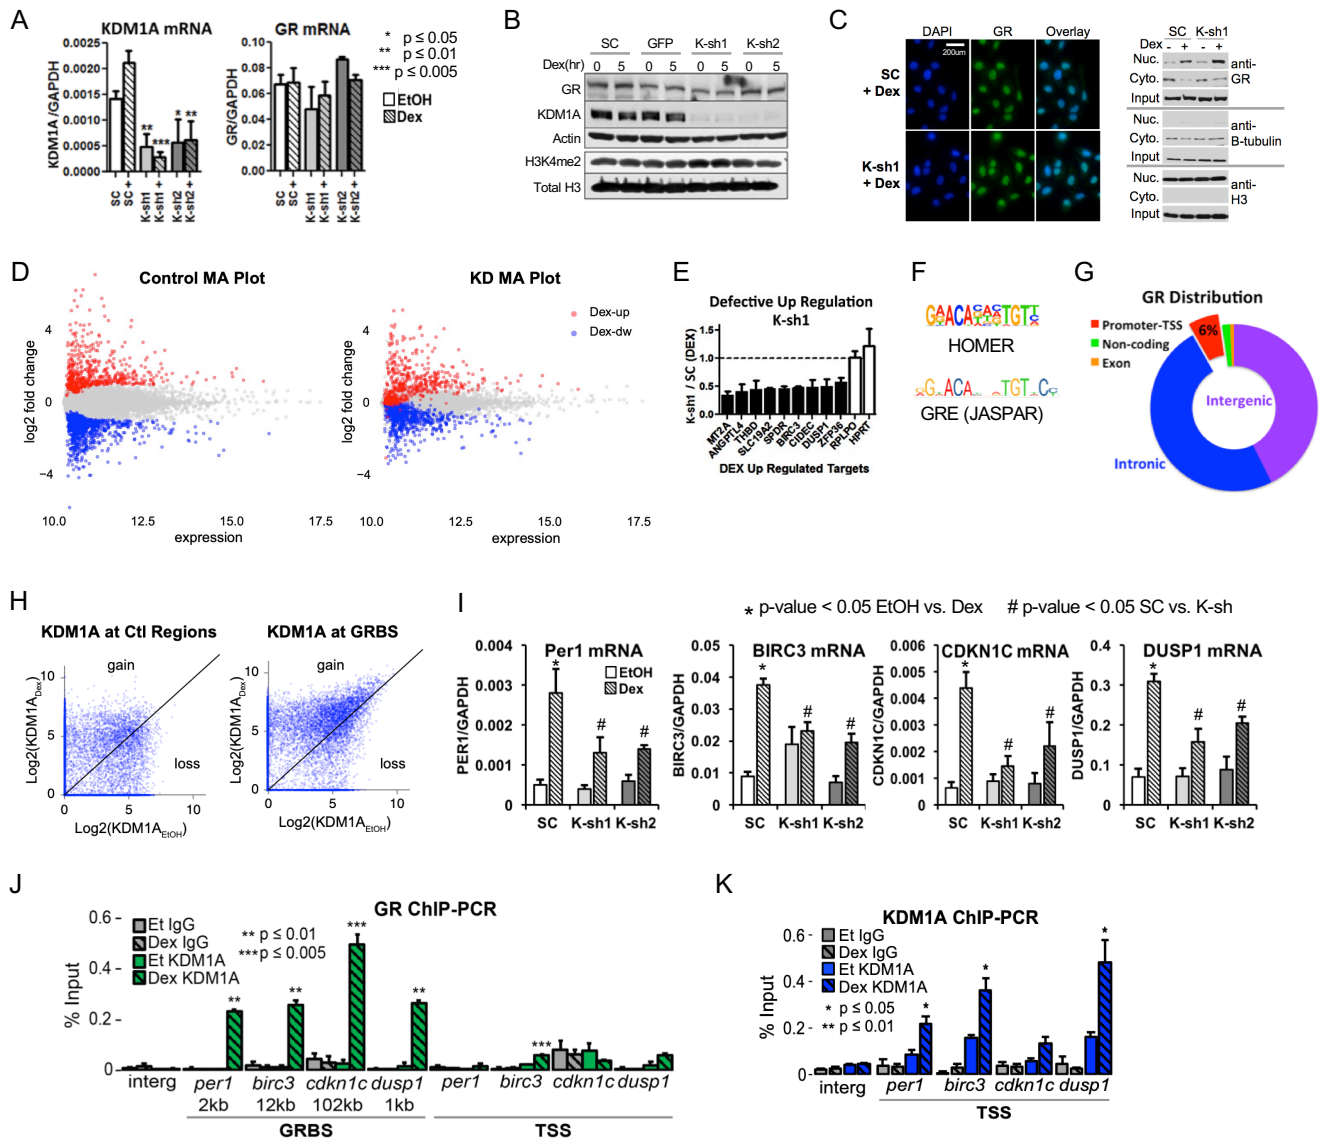

**Related to Figure 1. Figure S1. KDM1A is a key GR co-regulator and is recruited to GRBSs.**

(A-B) KDM1A KD in A549 by transduced shRNA measuring (A) mRNA by RT-qPCR and (B) protein by Western blot. Antibody used indicated on the left. Two shRNA constructs against KDM1A were tested (K-sh1 and K-sh2).

Scramble (SC) and GFP shRNAs used as controls. RNA normalized to GAPDH; N=3; bars plot mean + SE; p-values, Student's t-test comparing SC to K-sh within treatment. No significance was found between SC and K-sh1 for GR mRNA.

(C) Left panel, immunofluorescence staining of GR in Dex treated A549 cells transduced with control (SC) or KDM1A (K-sh1) shRNA. Right panel, Western blot of whole cell lysate (Input), nuclear (Nuc.) or cytoplasmic fractions (Cyto.) from Dex (+) or ethanol (-) treated cells transduced with control (SC) or KDM1A (K-sh1) shRNA.

(D) MA plots of genes with transcript counts >10. Dex-responsive genes are colored by up or down regulation in control.

(E) RT-qPCR confirmation of nine Dex-induced genes co-dependent on KDM1A. Two control genes not regulated by Dex or KDM1A shown in white. Dashed line indicates no change in Dex-response. Normalized to GAPDH. Bars plot mean + SE of biological triplicates.

(F) Top *de novo* motif identified from GRBSs by HOMER and the consensus GR motif from Jasparr.

(G) Genome-wide distribution of GRBSs. Promoters defined as 2 kb upstream of an annotated TSS.

(H) KDM1A density in Dex versus EtOH treated cells. Left panel shows control regions and right panel shows all GRBSs. Solid line indicates 0 change, points above gain KDM1A, and points below lose KDM1A.

(I) RT-qPCR of Dex-induced genes. Cells transduced with control (SC) or KDM1A shRNAs (K-sh1 or Ksh2). P-values by Student's t-test.

(J-K) ChIP-qPCR for GR (J) and KDM1A (K) at the TSS and nearby GRBSs as in Figure 1E. Bars plot mean + SE of 3-4 replicates; p-values by Student's t-test between EtOH and Dex.

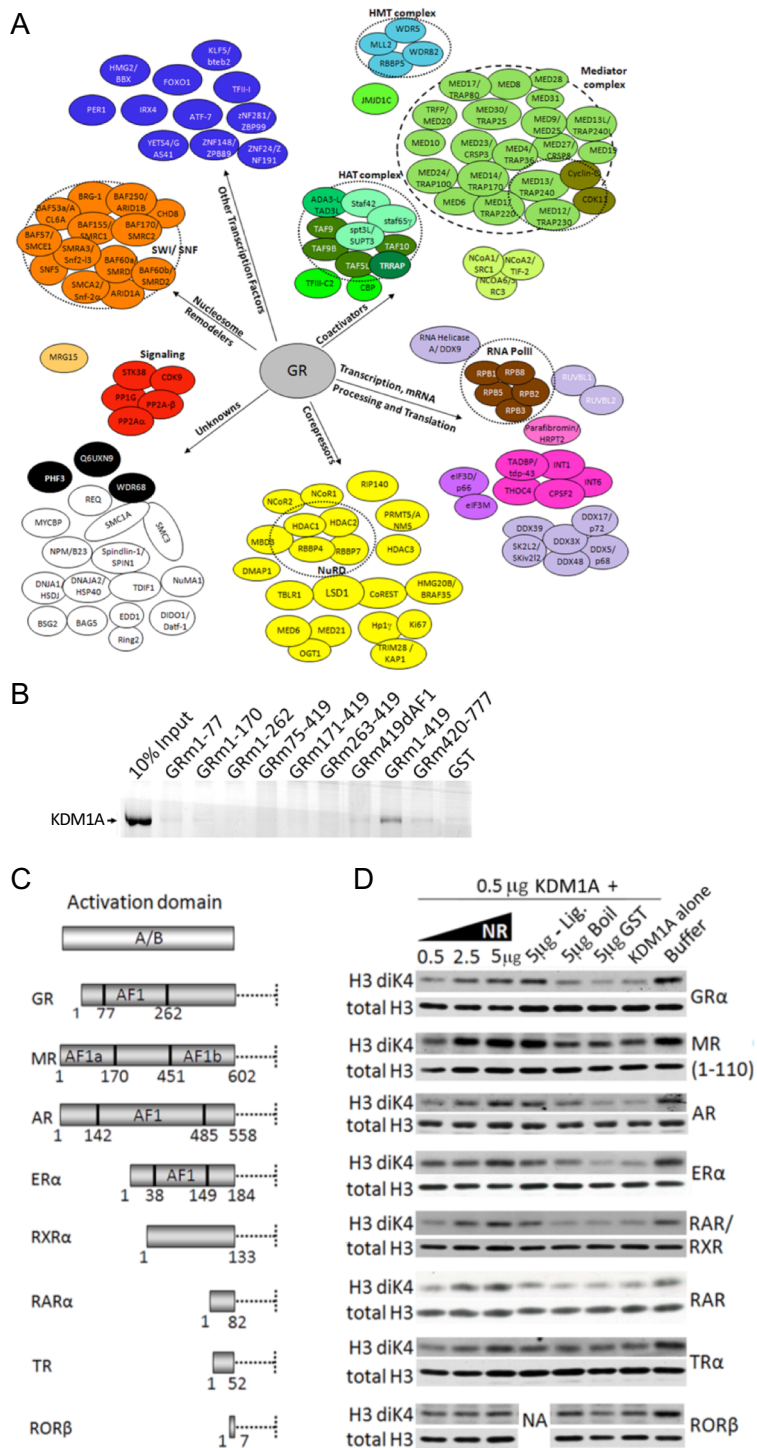

**Related to Figure 2. Figure S2. GR complex components and the conserved function of many NRs to inhibit KDM1A.**

(A) Diagram of components identified by MS/MS in TAP GR sample.

(B) Silver stain of KDM1A pulldown by GST-tagged GR N-terminal activation domain truncation mutants.

(C) Diagram showing homologous N-terminal domains of each NR.

(D) Most NRs inhibit KDM1A histone demethylase activity. Western blot with modification specific antibodies from cell-free HDM assays. Antibodies indicated on left. The NR added to each reaction indicated on right. Full-length NR used in all reactions except for MR, which contained only the first 110 amino acids. RAR/RXR indicates both proteins added to form heterodimers. All reactions contain the relevant ligand.

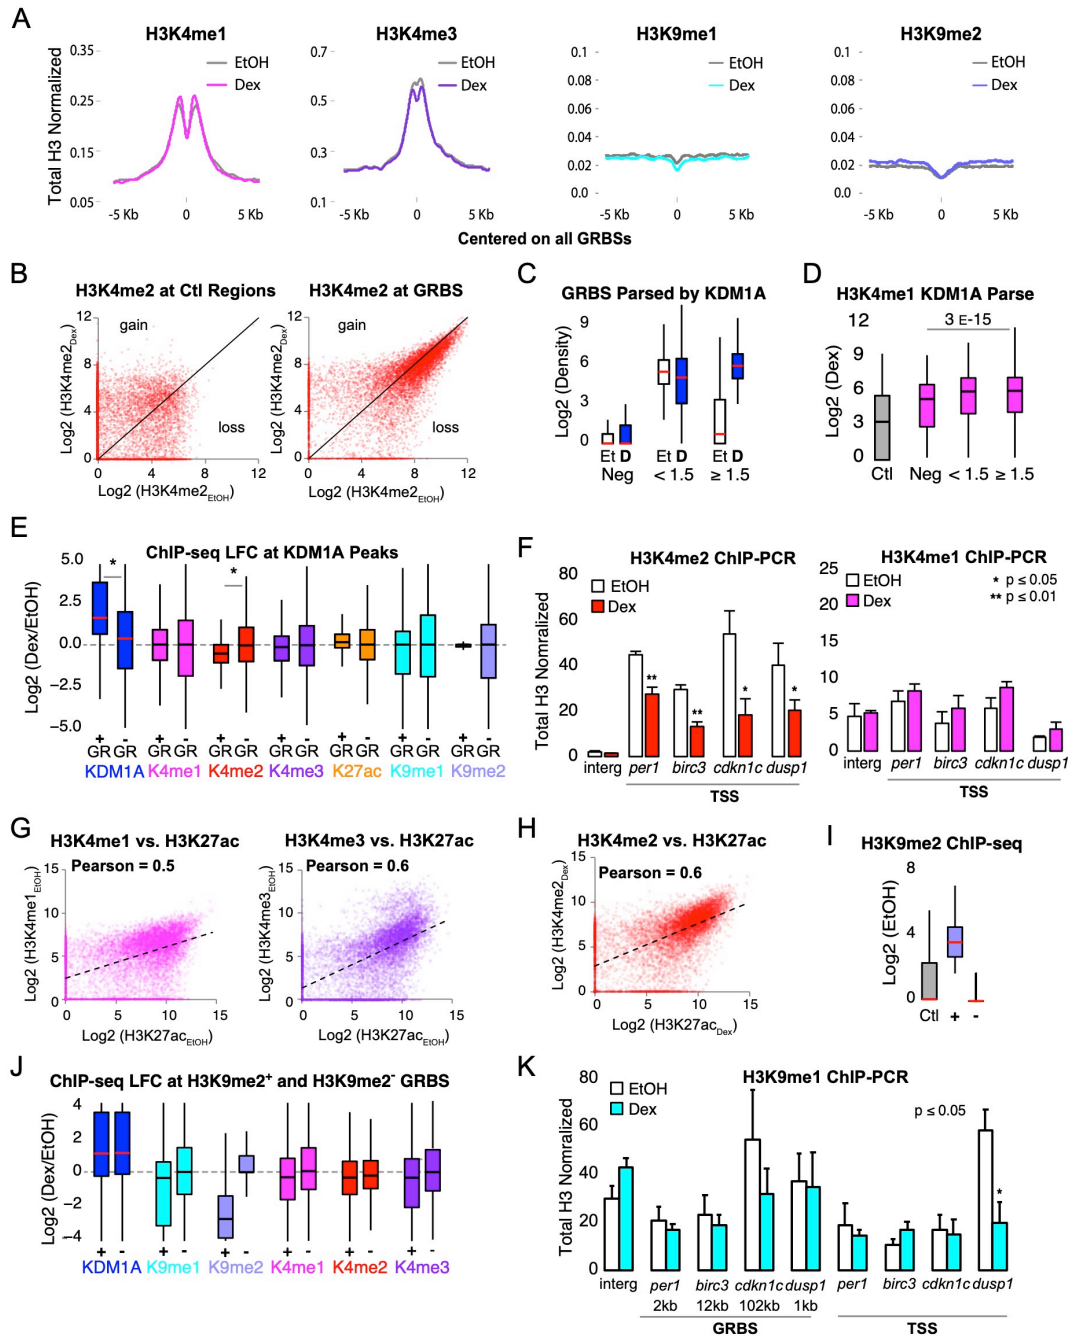

**Related to Figure 3. Figure S3. H3K9me2 demethylation at a small subset of GRBSs.**

(A) Average H3K4me1 (magenta), H3K4me3 (purple), H3K9me1 (cyan), H3K9me2 (lavender) ChIP-seq density.

(B) H3K4me2 density in Dex versus EtOH at all GRBSs and control regions as in Figure S1H.

(C-D) Boxplots of KDM1A (E) and H3K4me1 in Dex (F) at GRBSs parsed by KDM1A status, as in Figure 3C. P-value from Mood's Median test between indicated groups. Et, ethanol control; D, Dex.

(E) Boxplots of ChIP-seq LFC at KDM1A peaks overlapping GRBSs (+ GR) or not overlapping GRBSs (- GR). Dotted line is LFC=0, \* indicates p-value < 1 E-74 by Mood's Median test.

(F) ChIP-qPCR of H3K4me2 (red) and H3K4me1 (magenta) at the TSS of four GR-KDM1A co-regulated genes. Bars plot mean + SE of 3-4 replicates; p-values by Student's t-test.

(G) H3K4me1 (magenta) or H3K4me3 (purple) versus H3K27ac at all GRBSs after EtOH.

(H) H3K4me2 versus H3K27ac density at all GRBSs after Dex.

(I) Boxplots of H3K9me2 ChIP-seq after EtOH at control regions (Ctl) and H3K9me2<sup>+</sup> (+) or H3K9me2<sup>-</sup> (-) GRBSs. H3K9me2<sup>+</sup> sites defined as > mean control (n=2322).

(J) Boxplots of Dex-induced changes at H3K9me2<sup>+</sup> and H3K9me2<sup>-</sup> GRBSs. Dotted line indicates LFC=0.

(K) H3K9me2 ChIP-qPCR as in Figure 1E. N=3-4, bars plot mean + SE, p-value Student's t-test EtOH vs. Dex.

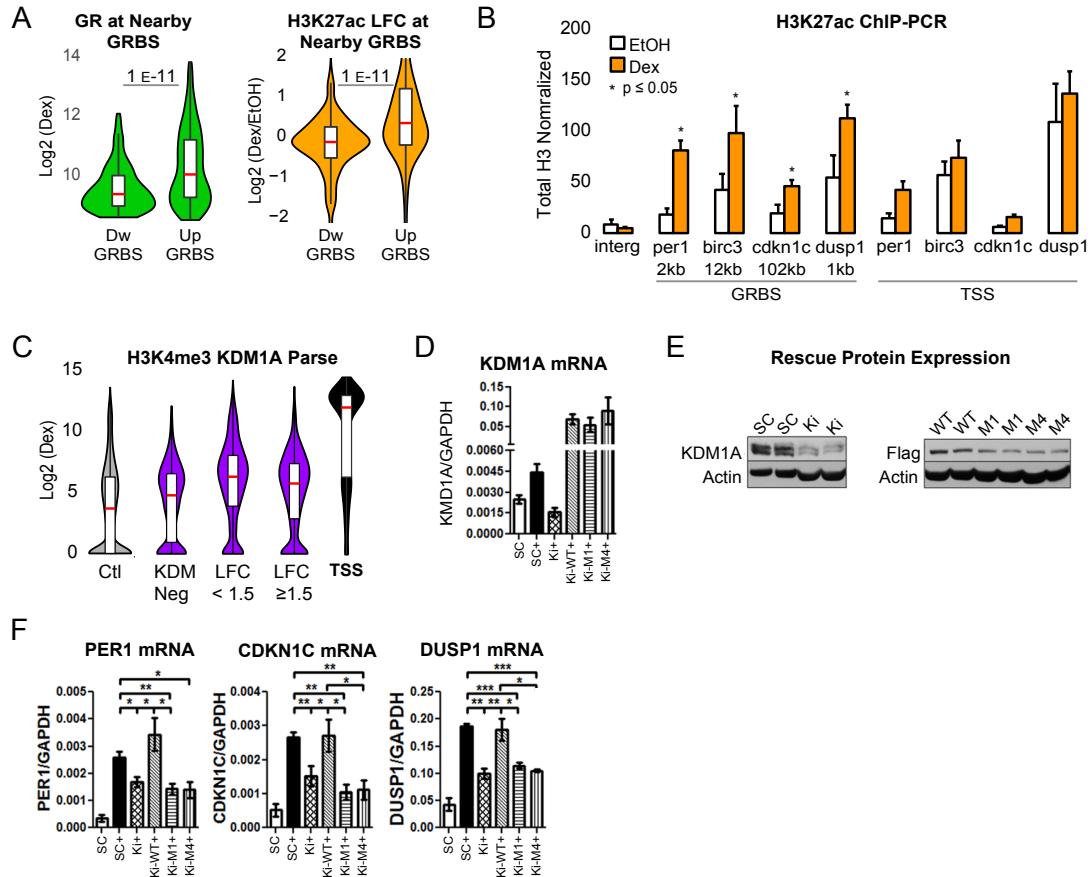

**Related to Figure 4. Figure S4. KDM1A functions at active enhancers to remove H3K4me2 and rescue experiments show KDM1A activity is required for co-regulation.**

(A) Violin boxplots of GR density (green) and H3K27ac LFC (orange) at GRBSs near Dex-induced (Up) and Dex-repressed (Dw) genes. P-values by Mood's Median test.

(B) ChIP-qPCR for H3K27ac at TSS and nearby GRBSs of GR-KDM1A co-regulated genes. N=3-4, bars plot the mean + SE, p-value by Student's t-test between EtOH and Dex.

(C) Violin boxplots of H3K4me3 at GRBSs parsed by KDM1A status (as in Figure 3C) and TSS of control genes (black violin) for comparison.

(D-F) Rescue experiments using KDM1A cDNA resistant to a lentiviral RNAi construct against KDM1A (Ki) and two KDM1A catalytic mutants.

(D-E) Expression of WT and mutant KDM1A measured by RT-qPCR (D) and Western blot (E). Ki-WT denotes resistant wild-type KDM1A expressed with KDM1A RNAi. Flag antibody was used to detect tagged KDM1A. M1 has a mutation in the FAD domain (E308A) and M4 in the amine oxidase domain (A814T). M1 and M4 are RNAi resistant and lack HDM activity.

(F) RT-qPCR of three GR-KDM1A co-regulated genes. Ki blocks induction, expression of WT KDM1A rescues induction but neither M1 nor M4 rescue. N=3-4, bars show mean + SE, p-value by Student's t-test.

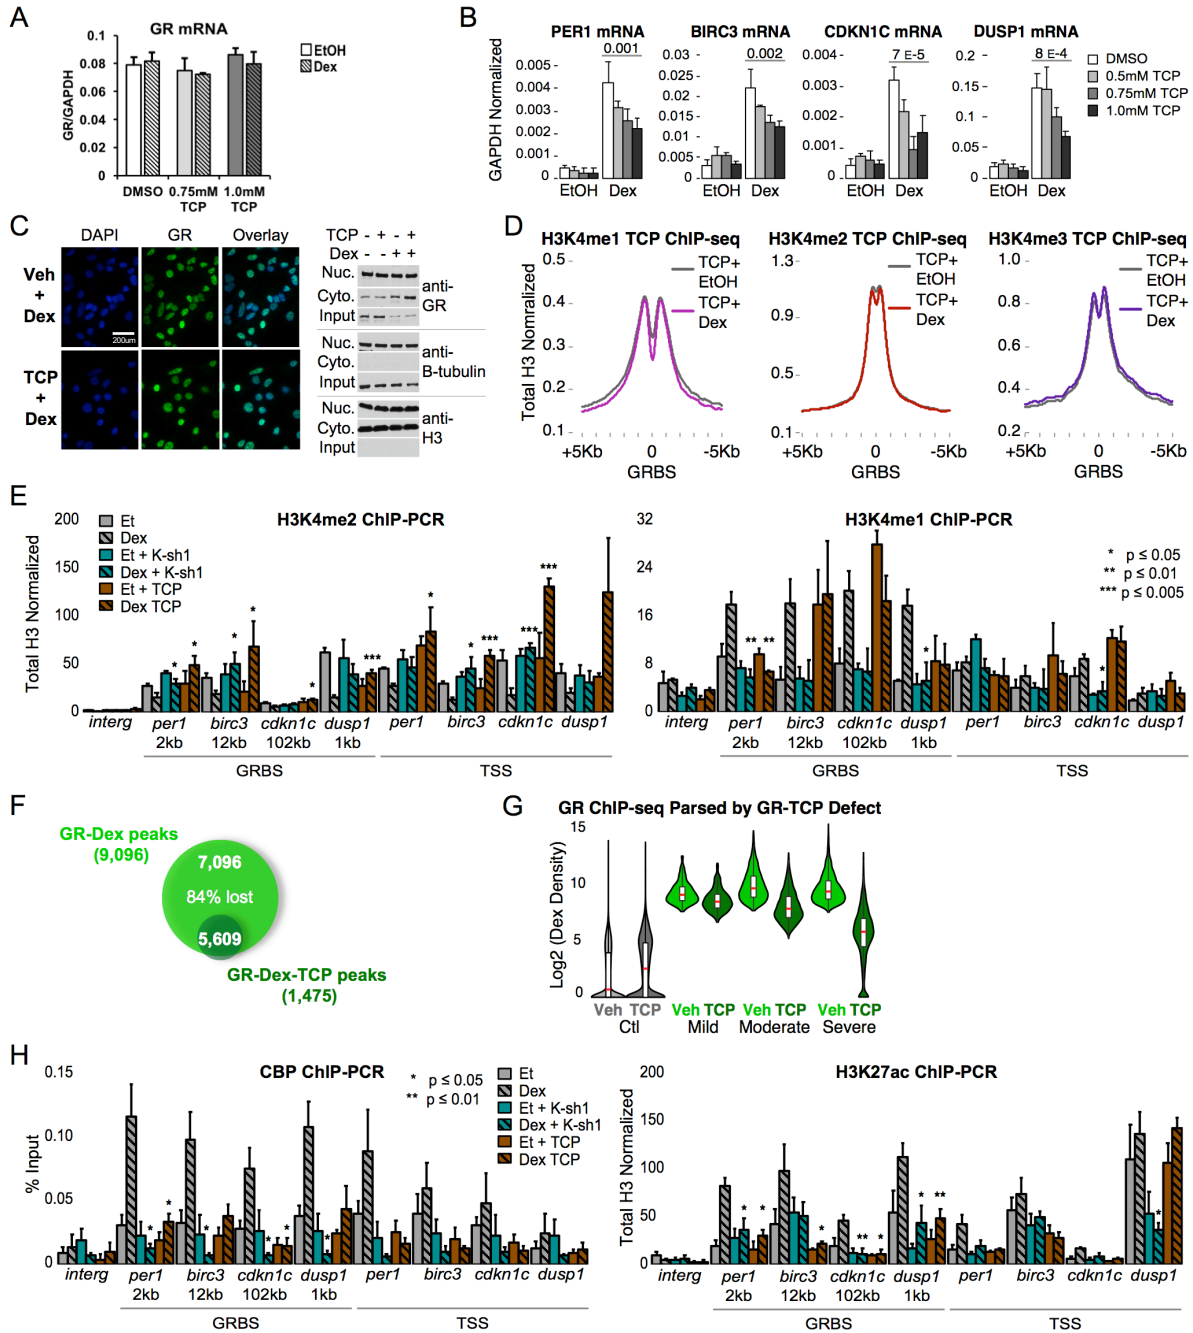

**Related to Figure 5. Figure S5. KDM1A-mediated H3K4me2 demethylation promoting GR and cofactor binding in the genome.**

(A-B) RT-qPCR from cells treated with the KDM1A inhibitor, TCP, prior to Dex or EtOH treatment. 0mM TCP treated with DMSO. N=3, bars plot mean + SE, p-value by ANOVA between Dex treated samples.

(C) A549 cells were treated with TCP or DMSO (Veh) for 24 h followed by 1 h Dex treatment. Left panel, immunofluorescence staining of GR; Right panel, Western blot of whole cell lysate (Input), nuclear (Nuc.) and cytoplasmic fractions (Cyto.).

(D) H3K4me1 (dark magenta), H3K4me2 (dark red), H3K4me3 (dark purple) ChIP-seq density at all GRBSs in cells treated with TCP for 24 h followed by two-hour Dex or EtOH treatment.

(E) ChIP-qPCR for histone modifications at the TSS and nearby GRBSs of co-regulate genes, as in Figure 5F.

(F) Venn diagram of GR peaks identified in Dex and Dex-TCP treated cells using the same peak calling parameters.

(G) Violin boxplots of GR density at GRBSs parsed by TCP-induced GR loss, as in Figure 5G.

(H) ChIP-qPCR for CBP and H3K27ac at co-regulate genes and nearby GRBSs, as in (E).
